# Supplementary material for: Fibroblast growth factor signalling controls nervous system patterning and pigment cell formation in Ciona intestinalis
Source: PubMed Central journal article supplement — Nat Commun. 2014 Sep 5;5:4830. doi: 10.1038/ncomms5830 (PMC4164782; doi:10.1038/ncomms5830), 2014-09-05
Supplement: ncomms5830-s1.pdf [file ncomms5830-s1.pdf]

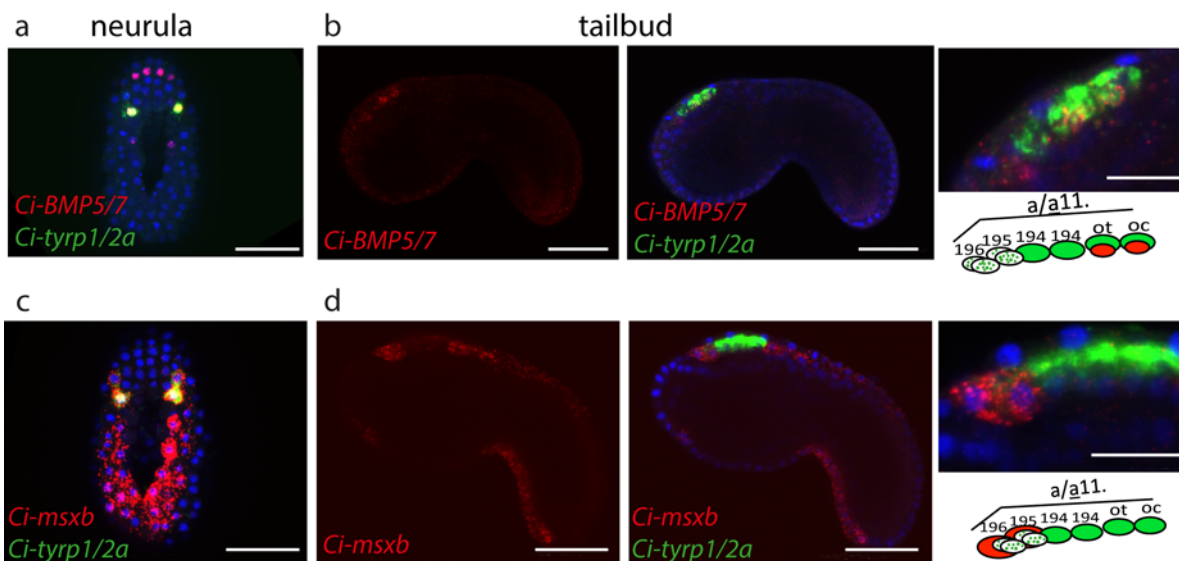

Supplementary Fig. 2 **Expression pattern of *Ci-BMP5/7* and *Ci-Msx***: (a-b) Double Fluorescent WMISH of *Ci-BMP5/7* and *Ci-Msx* (red) with *Ci-tyrp1/2a* (green). (a) expression of *Ci-BMP5/7* at neurula stage is confined to the anterior border of the neural plate and in the a10.97 cell pair as confirmed by *Ci-tyrp1/2a* localization. (b) Lateral view of middle tailbud stage, *Ci-BMP5/7* is weakly expressed in the anterior CNS and in the otolith and ocellus melanocyte precursors (a11.193s). (c) at neurula stage expression of *Ci-msxb* is detected along the lateral border of the neural plate including PCPs (a10.97s and a10.98s, as confirmed by *Ci-tyrp1/2a*; (d) at middle tailbud stage, *Ci-msxb* become excluded from a11.193s/a11.194s as confirmed by *Ci-tyrp1/2a* detection but it conserves the expression in a11.195s/a11.196s that present a very faint expression of *Ci-tyrp1/2a*. Zoom and schematic representation of cells expressing *Ci-tyrp1/2a* and *Ci-BMP5/7* and *Ci-msxb*, respectively, adapted from Cole and Meinertzhagen, 2004; (a,c) vegetal view, anterior is up; (b,d) lateral view, anterior is to the left. Scale bar 50  $\mu$ m. nuclear staining by DAPI (blue).



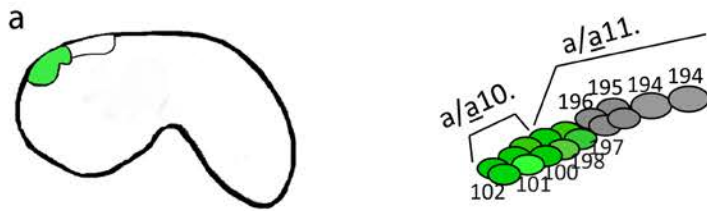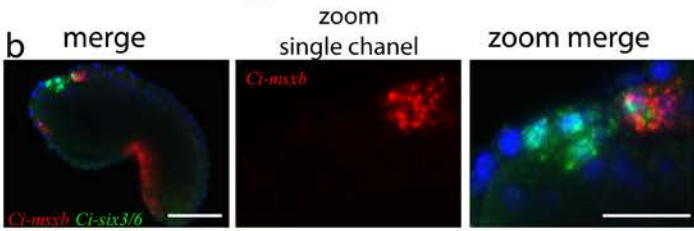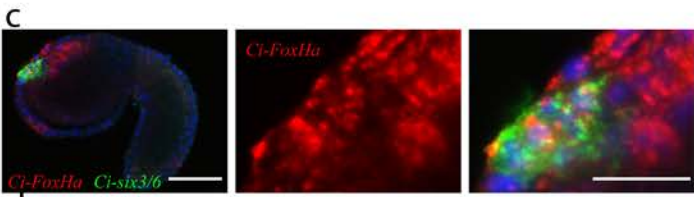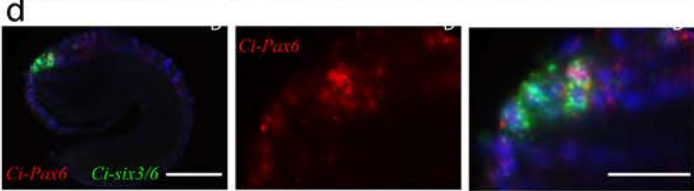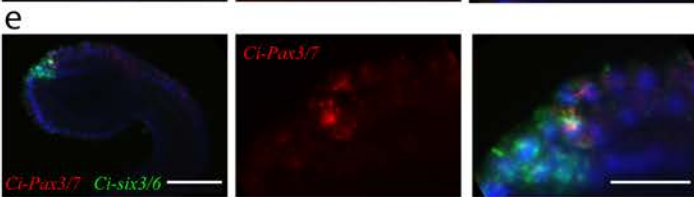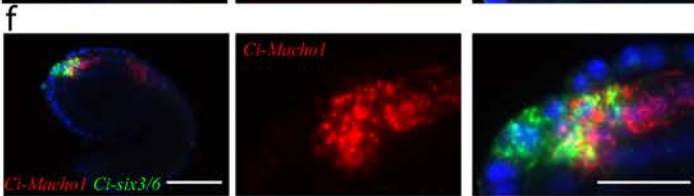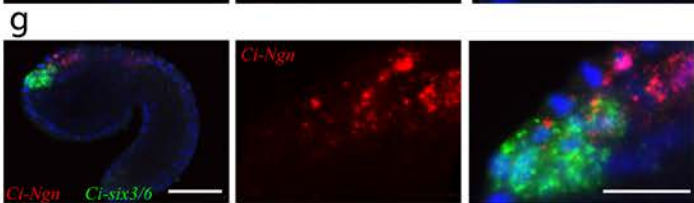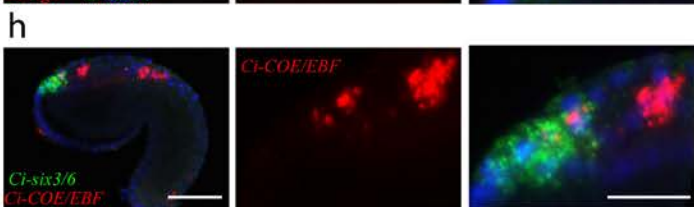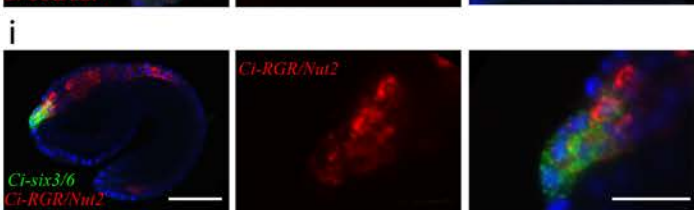

Supplementary Fig.3 **Co-localization of *Ci-Six3/6* with anterior CNS markers:** (a) Schematic illustration of CNS *Ciona* tailbud stage (left) with part of a9.50 and a9.49 derived cells (right) showing *Six3/6* expression domain (green), adapted from Cole and Meinertzhagen, 2004. (b-i) Double WMISH for TFs Up-regulated when comparing  $FGFR^{DN}$  vs Control: *Ci-msxb* (b), *Ci-FoxHa* (c), *Ci-Pax6* (d), *Ci-Pax3/7* (e), *Ci-Machol* (f), *Ci-Ngn* (g), *Ci-COE* (h), *Ci-RGR/Nut2* (i) expression domains (red) are compared to *Ci-Six3/6* expression (green), considered as a molecular marker for the anterior sensory vesicle. Lateral view, anterior is on the left. Scale bar 50 $\mu$ m; scale bar 20 $\mu$ m for zoomed embryos; nuclear staining by DAPI (blue).

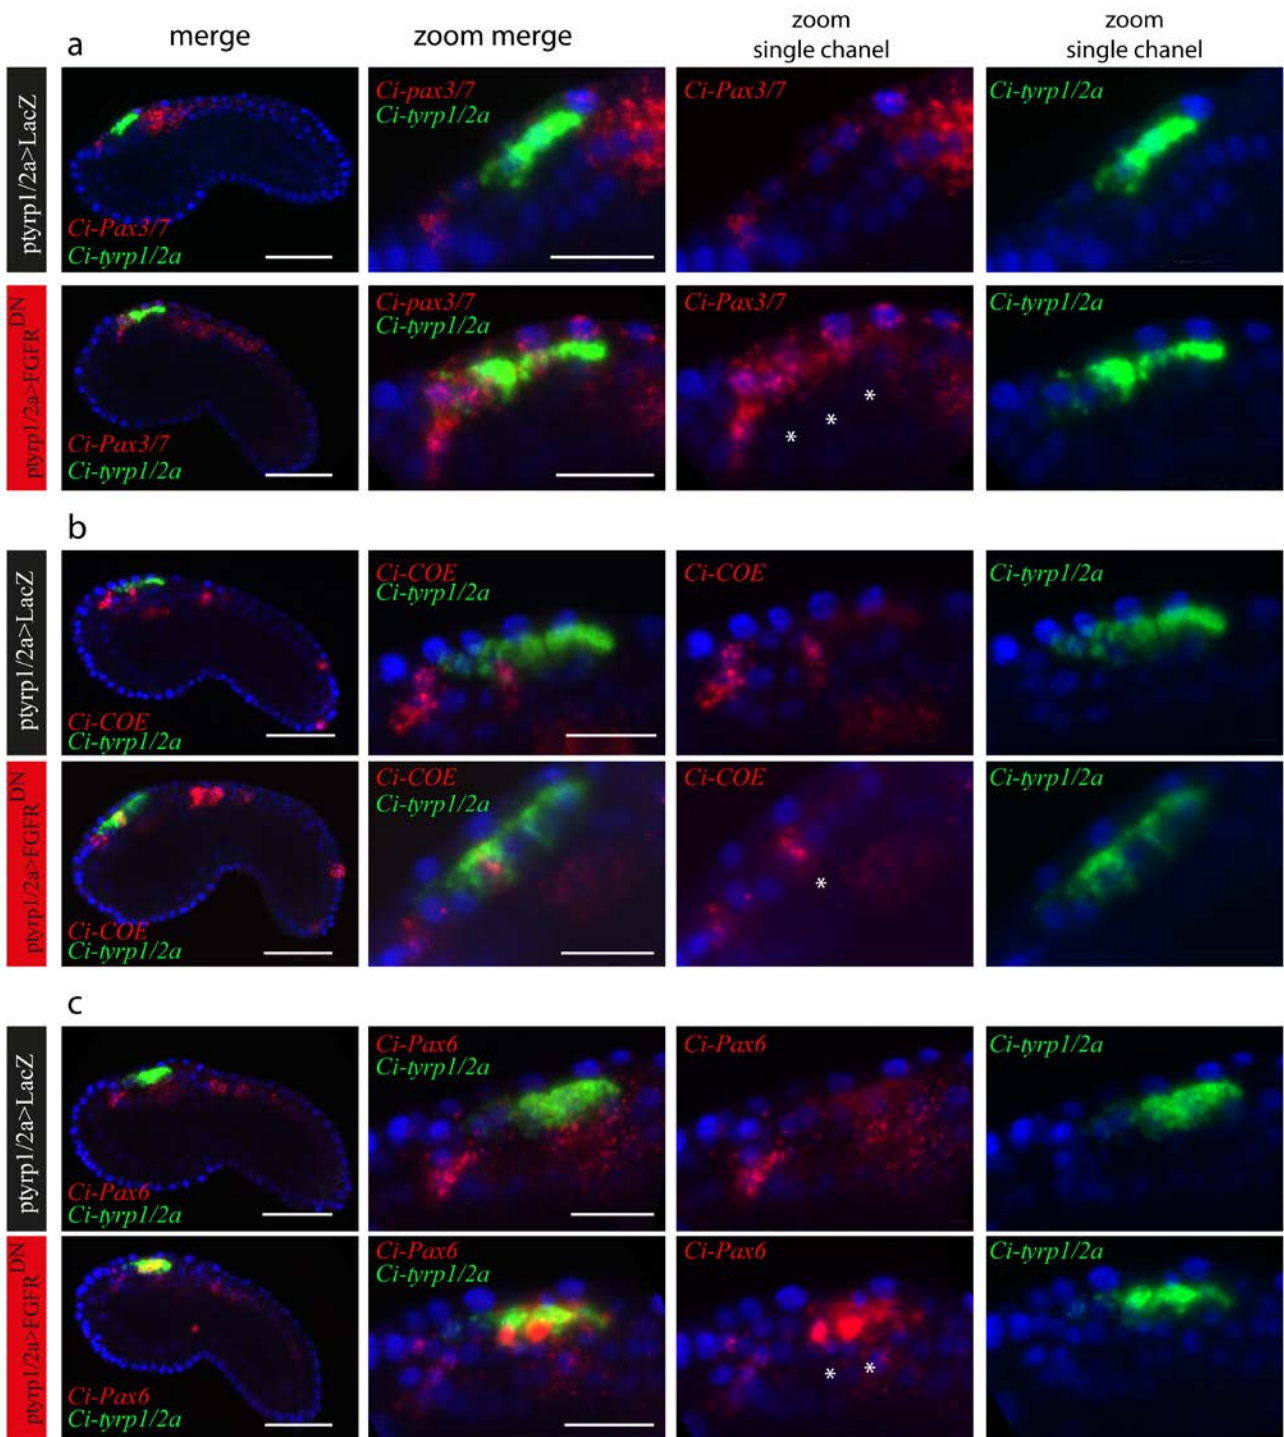

**Supplementary Fig.4 FGF signaling inhibits anterior CNS markers in the adjacent PCs:**

Double Fluorescent WMISH of *Ci-Pax3/7*(a), *Ci-COE* (b) and *Ci-Pax6* (c)(red) with *Ci-tyrp1/2a* (green) on electroporated embryos with *ptyrp1/2a>LacZ* (black box) and *ptyrp1/2a>FGFR<sup>DN</sup>* (red box). (a) Control embryos: *Ci-Pax3/7* is expressed in anterior dorsal neural cells but is mostly excluded from *Ci-tyrp1/2a<sup>+</sup>* cells. *FGFR<sup>DN</sup>* embryos: *Ci-Pax3/7* overlaps with *Ci-tyrp1/2a* in a10.97 derivatives (white asterisks). (b) Control embryos: *Ci-COE* is expressed in several neural cells but is almost excluded from *Ci-tyrp1/2a<sup>+</sup>* cells. *FGFR<sup>DN</sup>* embryos: *Ci-COE* expression is clearly increased in *Ci-tyrp1/2a* expressing cells, in particular with a11.194s (white asterisks). (c) Control

embryos: *Ci-Pax6* is expressed all along the dorsal neural tube with a faint expression in *Ci-tyrp1/2a*<sup>+</sup> cells. FGFR<sup>DN</sup> embryos: *Ci-Pax6* expression is strongly enhanced in *Ci-tyrp1/2a* expressing cells (white asterisks).

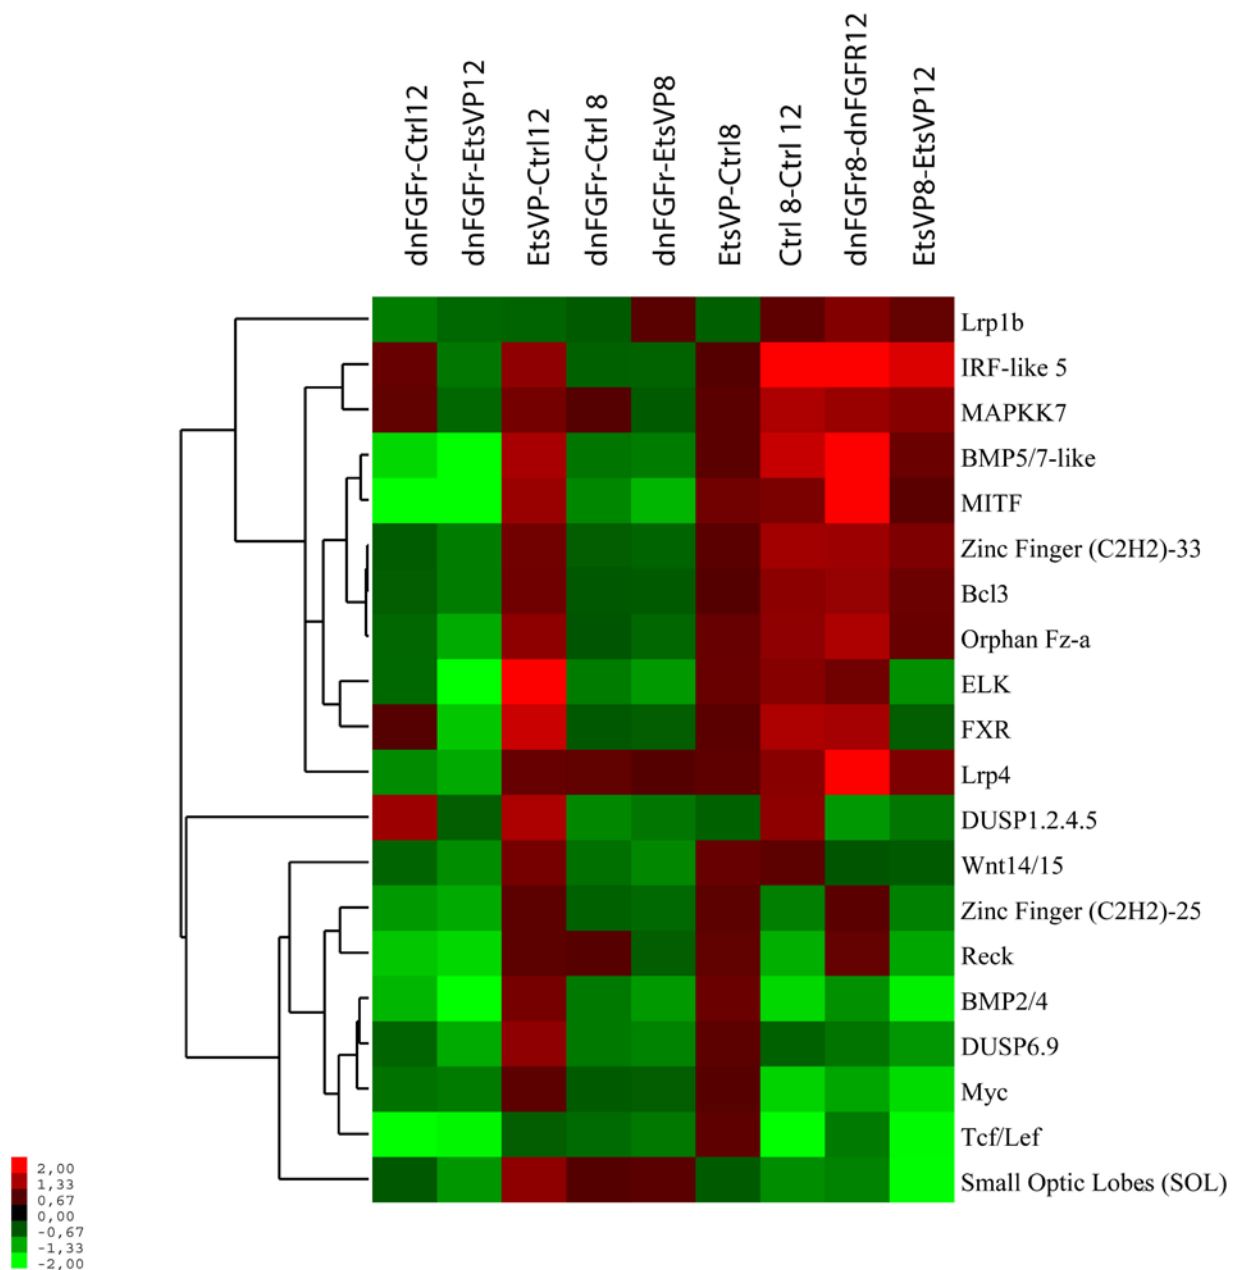

Supplementary Fig.5 **Hierarchical clustering and heat map for regulatory genes involved PCP fate specification**: expression values ( $\log_2$  FC) consisting of 20 regulatory genes including, novel candidate regulators of PCP formation, FGF, BMP and Wnt signalling components; clustering was performed taking in account all three conditions (control,  $FGFR^{DN}$ , Ets:Vp16) at the two developmental stages (8 and 12 hpf); expression levels are colour coded with shades of red, green and black corresponding to an increase, decrease and no change in gene expression, respectively, as represented by the colour range below.



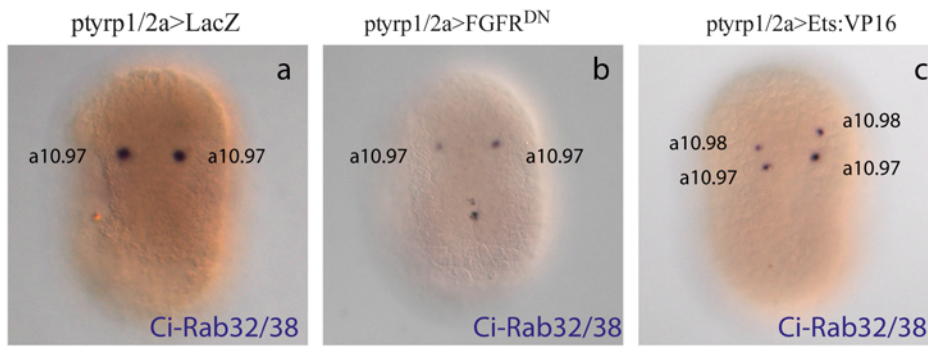

Supplementary Fig.6 **Differential expression of *Ci-Rab32/38* in FGF signaling pertubated embryos:** WMISH experiments using *Ci-Rab32/38* antisense RNA as probe to reveal *Ci-Rab32/38* expression on electroporated embryos with ptyrp1/2a>LacZ (a), ptyrp1/2a>FGFR<sup>DN</sup> (b) and ptyrp1/2a>Ets:Vp16 (c) at neurul a stage (8hpf). *Ci-Rab32/38* is expressed in a10.97 cell pairs in control embryo (a); on FGF pertubated embryos its expression resulted reduced in a10.97 cell pairs when FGF signaling is blocked (b) while it appears expanded in a10.98 cells in ptyrp1/2a>Ets:VP16 embryos (c).

**Supplementary Table-1: GO analysis on transcripts differential expressed when comparing FGFRDN to control at 8 and 12hpf**

| GO.id      | n.uni | n.sel | p.uni       | p.sel       | p.value     | adj.p       | Definition                                                              |
|------------|-------|-------|-------------|-------------|-------------|-------------|-------------------------------------------------------------------------|
| GO:0043473 | 43    | 13    | 0.204168843 | 1.431718062 | 3.78E-12    | 7.75E-09    | pigmentation                                                            |
| GO:0009263 | 4     | 4     | 0.018992451 | 0.440528634 | 8.99E-09    | 0.0000184   | deoxyribonucleotide biosynthetic process                                |
| GO:0006345 | 4     | 4     | 0.018992451 | 0.440528634 | 8.99E-09    | 0.0000184   | loss of chromatin silencing                                             |
| GO:0035059 | 4     | 4     | 0.018992451 | 0.440528634 | 8.99E-09    | 0.0000184   | RCAF complex                                                            |
| GO:0030156 | 4     | 4     | 0.018992451 | 0.440528634 | 8.99E-09    | 0.0000184   | benzodiazepine receptor binding                                         |
| GO:0030050 | 5     | 4     | 0.023740563 | 0.440528634 | 8.06E-08    | 0.000164738 | vesicle transport along actin filament                                  |
| GO:0000074 | 239   | 28    | 1.134798917 | 3.083700441 | 0.000000176 | 0.000359713 | regulation of cell cycle                                                |
| GO:0004748 | 10    | 5     | 0.047481126 | 0.550660793 | 0.000000239 | 0.000488626 | ribonucleoside-diphosphate reductase activity                           |
| GO:0030318 | 16    | 6     | 0.075969802 | 0.660792952 | 0.000000434 | 0.000885326 | melanocyte differentiation                                              |
| GO:0030178 | 104   | 16    | 0.493803713 | 1.762114537 | 0.000000627 | 0.001277442 | negative regulation of Wnt receptor signaling pathway                   |
| GO:0042393 | 74    | 13    | 0.351360334 | 1.431718062 | 0.000000772 | 0.001574157 | histone binding                                                         |
| GO:0051270 | 17    | 6     | 0.080717915 | 0.660792952 | 0.00000093  | 0.001894222 | regulation of cellular component movement                               |
| GO:0005971 | 3     | 3     | 0.014244338 | 0.330396476 | 0.00000192  | 0.003918366 | ribonucleoside-diphosphate reductase complex                            |
| GO:0048319 | 3     | 3     | 0.014244338 | 0.330396476 | 0.00000192  | 0.003918366 | axial mesoderm morphogenesis                                            |
| GO:0046022 | 3     | 3     | 0.014244338 | 0.330396476 | 0.00000192  | 0.003918366 | positive reg. of transcription from RNA pol. II promoter during mitosis |
| GO:0048625 | 3     | 3     | 0.014244338 | 0.330396476 | 0.00000192  | 0.003918366 | myoblast cell fate commitment                                           |
| GO:0035182 | 3     | 3     | 0.014244338 | 0.330396476 | 0.00000192  | 0.003918366 | female germline ring canal outer rim                                    |
| GO:0030725 | 3     | 3     | 0.014244338 | 0.330396476 | 0.00000192  | 0.003918366 | germline ring canal formation                                           |
| GO:0007090 | 7     | 4     | 0.033236788 | 0.440528634 | 0.00000197  | 0.004008919 | regulation of S phase of mitotic cell cycle                             |
| GO:0031489 | 7     | 4     | 0.033236788 | 0.440528634 | 0.00000197  | 0.004008919 | myosin V binding                                                        |
| GO:0007052 | 79    | 13    | 0.375100897 | 1.431718062 | 0.0000025   | 0.005064511 | mitotic spindle organization                                            |
| GO:0043113 | 69    | 12    | 0.327619771 | 1.321585903 | 0.00000257  | 0.00521118  | receptor clustering                                                     |
| GO:0007067 | 465   | 41    | 2.207872371 | 4.515418502 | 0.00000481  | 0.009743447 | mitosis                                                                 |
| GO:0051301 | 643   | 52    | 3.053036418 | 5.726872247 | 0.00000516  | 0.010448905 | cell division                                                           |
| GO:0006260 | 405   | 37    | 1.922985613 | 4.074889868 | 0.00000539  | 0.010901444 | DNA replication                                                         |

|            |      |    |             |             |            |             |                                                                                  |
|------------|------|----|-------------|-------------|------------|-------------|----------------------------------------------------------------------------------|
| GO:0007049 | 1130 | 80 | 5.365367267 | 8.810572687 | 0.0000059  | 0.011931903 | cell cycle                                                                       |
| GO:0042994 | 8    | 4  | 0.037984901 | 0.440528634 | 0.00000657 | 0.013286636 | cytoplasmic sequestering of transcription factor                                 |
| GO:0000916 | 8    | 4  | 0.037984901 | 0.440528634 | 0.00000657 | 0.013286636 | contractile ring contraction involved in cell cycle cytokinesis                  |
| GO:0030538 | 8    | 4  | 0.037984901 | 0.440528634 | 0.00000657 | 0.013286636 | embryonic genitalia morphogenesis                                                |
| GO:0048619 | 8    | 4  | 0.037984901 | 0.440528634 | 0.00000657 | 0.013286636 | embryonic hindgut morphogenesis                                                  |
| GO:0042475 | 95   | 14 | 0.451070699 | 1.54185022  | 0.00000716 | 0.014440386 | odontogenesis of dentine-containing tooth                                        |
| GO:0004866 | 64   | 11 | 0.303879208 | 1.211453744 | 0.00000853 | 0.017214596 | endopeptidase inhibitor activity                                                 |
| GO:0007307 | 21   | 6  | 0.099710365 | 0.660792952 | 0.0000111  | 0.022398415 | eggshell chorion gene amplification                                              |
| GO:0000285 | 4    | 3  | 0.018992451 | 0.330396476 | 0.0000134  | 0.027079598 | 1-phosphatidylinositol-3-phosphate 5-kinase activity                             |
| GO:0021903 | 4    | 3  | 0.018992451 | 0.330396476 | 0.0000134  | 0.027079598 | rostrocaudal neural tube patterning                                              |
| GO:0007192 | 4    | 3  | 0.018992451 | 0.330396476 | 0.0000134  | 0.027079598 | activation of adenylate cyclase activity by serotonin receptor signaling pathway |
| GO:0004771 | 4    | 3  | 0.018992451 | 0.330396476 | 0.0000134  | 0.027079598 | sterol esterase activity                                                         |
| GO:0050580 | 4    | 3  | 0.018992451 | 0.330396476 | 0.0000134  | 0.027079598 | 2,5-didehydrogluconate reductase activity                                        |
| GO:0007561 | 4    | 3  | 0.018992451 | 0.330396476 | 0.0000134  | 0.027079598 | imaginal disc eversion                                                           |
| GO:0007500 | 9    | 4  | 0.042733014 | 0.440528634 | 0.0000182  | 0.036539142 | mesodermal cell fate determination                                               |
| GO:0031409 | 9    | 4  | 0.042733014 | 0.440528634 | 0.0000182  | 0.036539142 | pigment binding                                                                  |
| GO:0006726 | 9    | 4  | 0.042733014 | 0.440528634 | 0.0000182  | 0.036539142 | eye pigment biosynthetic process                                                 |
| GO:0000799 | 15   | 5  | 0.071221689 | 0.550660793 | 0.0000183  | 0.036628797 | nuclear condensin complex                                                        |
| GO:0004806 | 15   | 5  | 0.071221689 | 0.550660793 | 0.0000183  | 0.036628797 | triglyceride lipase activity                                                     |
| GO:0004867 | 137  | 17 | 0.65049143  | 1.872246696 | 0.0000192  | 0.038379162 | serine-type endopeptidase inhibitor activity                                     |

| <b>Supplementary Table-2: FGF hub genes in early PCPs</b>           |                   |               |               |                   |                    |
|---------------------------------------------------------------------|-------------------|---------------|---------------|-------------------|--------------------|
| <b>Blast homology</b>                                               | <b>Ciona</b>      | <b>Degree</b> | <b>pvalue</b> | <b>Regulation</b> | <b>Fold Change</b> |
| NA                                                                  | NA                | 778           | 0.001978      | down              | -1.122513          |
| C3AR_MOUSE (O09047) C3a anaphylatoxin chemotactic receptor (C3a-R)  | NA                | 776           | 0.001640      | down              | -2.0338864         |
| YAJ8_SCHPO (Q09908) Hypothetical protein C30D11.08c in chromosome I | Ci-NF001          | 622           | 0.000758      | up                | 1.4608647          |
| RAB32_HUMAN (Q13637) Rab-32, RAB38_MOUSE (Q8QZZ8) Rab-38            | Rab38, RAB32, ltd | 590           | 0.002078      | up                | 1.5973053          |
| MAML3_HUMAN (Q96JK9) Mastermind-like protein 3                      | mam               | 474           | 0.002523      | up                | 1.3477119          |
| MAMC2_HUMAN (Q7Z304) MAM domain containing protein 2 precursor      | NA                | 451           | 0.001639      | down              | -1.1346155         |
| MYRIP_HUMAN (Q8NFW9) Rab effector MyRIP                             | MLPH              | 340           | 0.001672      | up                | 2.8339636          |
| FUCTC_DROME (P83088) Alpha-(1,3)-fucosyltransferase C (EC 2.4.1.-)  | FucTA             | 169           | 0.000045      | up                | 2.0985527          |
